# Supplementary material for: Prioritization and functional assessment of noncoding variants associated with complex diseases
Source: Springer Nature journal article supplement (doi:10.1186/s13073-018-0565-y), 2018-07-11
Supplement: MOESM1 [file 13073_2018_565_MOESM1_ESM-1.pdf]

Table (S1-S4)

**Table S1. A tabular comparison between PAFA and seven other ensemble classifiers aimed at detecting functional/deleterious variants from background variants.**

|                   | Type                                                | Training set (functional/deleterious)                                                                           | Training set (non-functional/benign)                                                                                                               | Features                                                                                                         |
|-------------------|-----------------------------------------------------|-----------------------------------------------------------------------------------------------------------------|----------------------------------------------------------------------------------------------------------------------------------------------------|------------------------------------------------------------------------------------------------------------------|
| <b>PAFA</b>       | Sparse logistic regression with L1 regularization   | Variants annotated ‘pathogenic’ in ClinVar; SNP from GWASdb with p-value<10E-8 and genomic elements overlapped; | Variants annotated as ‘Benign’ in ClinVar; Variants in 1000 Genomes with low population differentiation                                            | Evolutionary conservation annotations;<br>Genomic annotations;<br>Population differentiation indexes;            |
| <b>CADD v1.3</b>  | Logistic regression                                 | Simulated de novo mutations                                                                                     | Variants in 1000 Genomes Project with DAF≥95%                                                                                                      | All kinds of annotations could be found                                                                          |
| <b>FATHMM-MKL</b> | Supervised SVM with a multiple kernel learning(MKL) | Heritable germ-line mutations in HGMD                                                                           | SNVs in the 1000 Genomes Project                                                                                                                   | Evolutionary conservation annotations;<br>Annotations from ENCODE;<br>GC Content;                                |
| <b>DANN</b>       | Deep neural network algorithm                       | Simulated de novo mutations                                                                                     | Human-Chimp fixed differences + 1000G above 95% derived                                                                                            | All kinds of annotations could be found                                                                          |
| <b>GWAVA</b>      | Supervised Random Forest                            | Variants annotated as ‘regulatory mutations’ in HGMD                                                            | Variants in 1000 Genomes Project (random selection/matched for distance to nearest TSS/ variants in the 1kb surrounding each of the HGMD variants) | Regulatory features;<br>Genic context;<br>Genome-wide properties;                                                |
| <b>DIVAN</b>      | Ensemble learning                                   | Disease-specific SNPs in ARB                                                                                    | Variants in 1000 Genomes Project                                                                                                                   | Epigenomic annotation;<br>Genomic annotation;                                                                    |
| <b>Eigen</b>      | Unsupervised spectral approach                      | /                                                                                                               | /                                                                                                                                                  | Protein function scores/regulatory annotations;<br>Evolutionary conservation annotations;<br>Allele Frequencies; |
| <b>LINSIGHT</b>   | Probabilistic evolutionary model                    | /                                                                                                               | /                                                                                                                                                  | Conservation scores;<br>Genomic annotation;                                                                      |

**Table S2. Comparisons among PAFA, Eigen, CADD, GWAVA, DANN, FATHMM-MKL and LINSIGHT in evaluating variants from four curated databases, including ClinVar, 1000 Genomes, GWAS catalog and COSMIC.** Area under the curve (AUC) values were calculated for each tool to evaluate their performance in 1) discriminating pathogenic coding variants from benign coding ones; 2) prioritizing noncoding recurrent variants from randomly selected common variants; 3) prioritizing cSNPs from randomly selected common variants.

| Tools                 | AUC values                                    |                          |                     |
|-----------------------|-----------------------------------------------|--------------------------|---------------------|
|                       | Likely Pathogenic vs. Likely Benign (ClinVar) | 1000genome vs. recurrent | 1000genome vs. cSNP |
| PAFA                  | 0.821                                         | 0.796                    | 0.701               |
| Eigen                 | 0.868                                         | 0.583                    | 0.572               |
| CADD v1.3             | 0.885                                         | 0.534                    | 0.514               |
| GWAVA.Region          | 0.494                                         | 0.589                    | 0.518               |
| GWAVA.TSS             | 0.487                                         | 0.457                    | 0.563               |
| GWAVA.Unmatched       | 0.542                                         | 0.396                    | 0.493               |
| DANN                  | 0.777                                         | 0.495                    | 0.451               |
| FATHMM-MKL.Coding     | 0.742                                         | 0.579                    | 0.458               |
| FATHMM-MKL.Non-Coding | 0.702                                         | 0.574                    | 0.501               |
| LINSIGHT              | /                                             | 0.416                    | 0.448               |

**Table S3. Comparisons among PAFA, Eigen, CADD, GWAVA, FATHMM-MKL and DANN in discriminating pathogenic variants from benign variants associated with Mendelian diseases.** Five genes, namely, BRCA1, BRCA2, CFTR, MLL2 and TERT were selected. Variants associated with BRCA1, BRCA2, CFTR, MLL2 were obtained from the Eigen website (Variants associated with BRCA1, BRCA2, CFTR, MLL2 were also treated as test sets in Eigen.); variants associated with TERT were obtained from the ClinVar website. We removed all the variants that occurred in the training set of PAFA. P values (Wilcoxon rank-sum test) were calculated for each tool.

| Gene  | n  | Score                        | P value         |
|-------|----|------------------------------|-----------------|
| BRCA1 | 37 | PAFA                         | <b>1.04E-08</b> |
|       |    | Eigen                        | 3.32E-07        |
|       |    | CADD v1.3                    | 8.07E-07        |
|       |    | GWAVA (Region Score)         | 3.42E-04        |
|       |    | GWAVA (TSS Score)            | 1.45E-03        |
|       |    | GWAVA (Unmatched Score)      | 2.16E-01        |
|       |    | FATHMM-MKL(Non-Coding Score) | 2.64E-01        |
|       |    | FATHMM-MKL(Coding Score)     | 2.11E-01        |
|       |    | DANN                         | 4.41E-03        |
| BRCA2 | 15 | PAFA                         | <b>4.59E-05</b> |
|       |    | Eigen                        | 1.41E-02        |
|       |    | CADD v1.3                    | 1.01E-03        |
|       |    | GWAVA (Region Score)         | 9.65E-01        |
|       |    | GWAVA (TSS Score)            | 1.21E-01        |
|       |    | GWAVA (Unmatched Score)      | 5.44E-02        |
|       |    | FATHMM-MKL(Non-Coding Score) | 6.97E-01        |
|       |    | FATHMM-MKL(Coding Score)     | 5.81E-01        |
|       |    | DANN                         | 6.94E-02        |
| CFTR  | 41 | PAFA                         | 4.16E-17        |
|       |    | Eigen                        | <b>3.31E-17</b> |
|       |    | CADD v1.3                    | 4.34E-13        |

|       |    |                              |                 |
|-------|----|------------------------------|-----------------|
|       |    | GWAVA (Region Score)         | 1.06E-04        |
|       |    | GWAVA (TSS Score)            | 1.48E-01        |
|       |    | GWAVA (Unmatched Score)      | 8.67E-02        |
|       |    | FATHMM-MKL(Non-Coding Score) | 2.01E-14        |
|       |    | FATHMM-MKL(Coding Score)     | 8.60E-15        |
|       |    | DANN                         | 1.58E-09        |
| MLL2  | 92 | PAFA                         | <b>1.07E-28</b> |
|       |    | Eigen                        | <b>7.08E-47</b> |
|       |    | CADD v1.3                    | 4.82E-36        |
|       |    | GWAVA (Region Score)         | 5.97E-03        |
|       |    | GWAVA (TSS Score)            | 8.46E-02        |
|       |    | GWAVA (Unmatched Score)      | 6.54E-01        |
|       |    | FATHMM-MKL(Non-Coding Score) | 1.82E-02        |
|       |    | FATHMM-MKL(Coding Score)     | 1.38E-18        |
|       |    | DANN                         | 5.32E-06        |
| TERT* | 41 | PAFA                         | <b>7.10E-07</b> |
|       |    | Eigen                        | 1.64E-01        |
|       |    | CADD v1.3                    | 9.49E-03        |
|       |    | GWAVA (Region Score)         | 7.95E-02        |
|       |    | GWAVA (TSS Score)            | 7.91E-01        |
|       |    | GWAVA (Unmatched Score)      | 8.83E-01        |
|       |    | FATHMM-MKL(Non-Coding Score) | 1.46E-01        |
|       |    | FATHMM-MKL(Coding Score)     | 2.89E-01        |
|       |    | DANN                         | 6.56E-03        |

**Table S4. Statistics of ten cancer-related variant sets from ICGC projects.**

| <b>project key</b> | <b>country</b> | <b>project name</b>                       | <b>total number</b> | <b>noncoding common number</b> | <b>recurrent (common)</b> | <b>non-recurrent (common)</b> | <b>noncoding rare number</b> | <b>recurrent (rare)</b> | <b>non-recurrent (rare)</b> |
|--------------------|----------------|-------------------------------------------|---------------------|--------------------------------|---------------------------|-------------------------------|------------------------------|-------------------------|-----------------------------|
| BLCA-CN            | china          | Bladder Urothelial carcinoma -CN          | 15,478              | 127                            | 53                        | 74                            | 963                          | 283                     | 680                         |
| COCA-CN            | china          | Colorectal Cancer                         | 399,862             | 74,685                         | 12,955                    | 61,730                        | 242,564                      | 47,680                  | 194,884                     |
| ESCA-CN            | china          | Esophageal Cancer -CN                     | 30,241              | 2,178                          | 546                       | 1,632                         | 5,408                        | 788                     | 4620                        |
| PAEN-AU            | Australia      | Pancreatic Cancer Endocrine neoplasms -AU | 144,516             | 3,794                          | 447                       | 3,347                         | 129,975                      | 7,298                   | 122,677                     |
| BOCA-FR            | France         | Bone Cancer-Ewing Sarcoma-FR              | 36,607              | 1,436                          | 166                       | 1,270                         | 31,632                       | 1,242                   | 30,390                      |
| EOPC-DE            | Germany        | Early Onset Prostate Cancer-DE            | 87,648              | 5,434                          | 732                       | 4,702                         | 76,763                       | 4,707                   | 72,056                      |
| PAEN-IT            | Italy          | Pancreatic Endocrine neoplasms -IT        | 106,578             | 2,614                          | 212                       | 2,402                         | 95,741                       | 2,085                   | 93,656                      |
| BTCA-JP            | Japan          | Biliary Tract Cancer-JP                   | 66,751              | 1,999                          | 451                       | 1,548                         | 25,388                       | 3,250                   | 22,138                      |
| THCA-SA            | Saudi Arabia   | Thyroid Cancer-SA                         | 21,261              | 614                            | 132                       | 482                           | 1,181                        | 336                     | 845                         |
| LAML-KR            | South Korea    | Acute Myeloid Leukemia-KR                 | 137,216             | 7,761                          | 2,665                     | 5,096                         | 111,088                      | 42,900                  | 68,188                      |

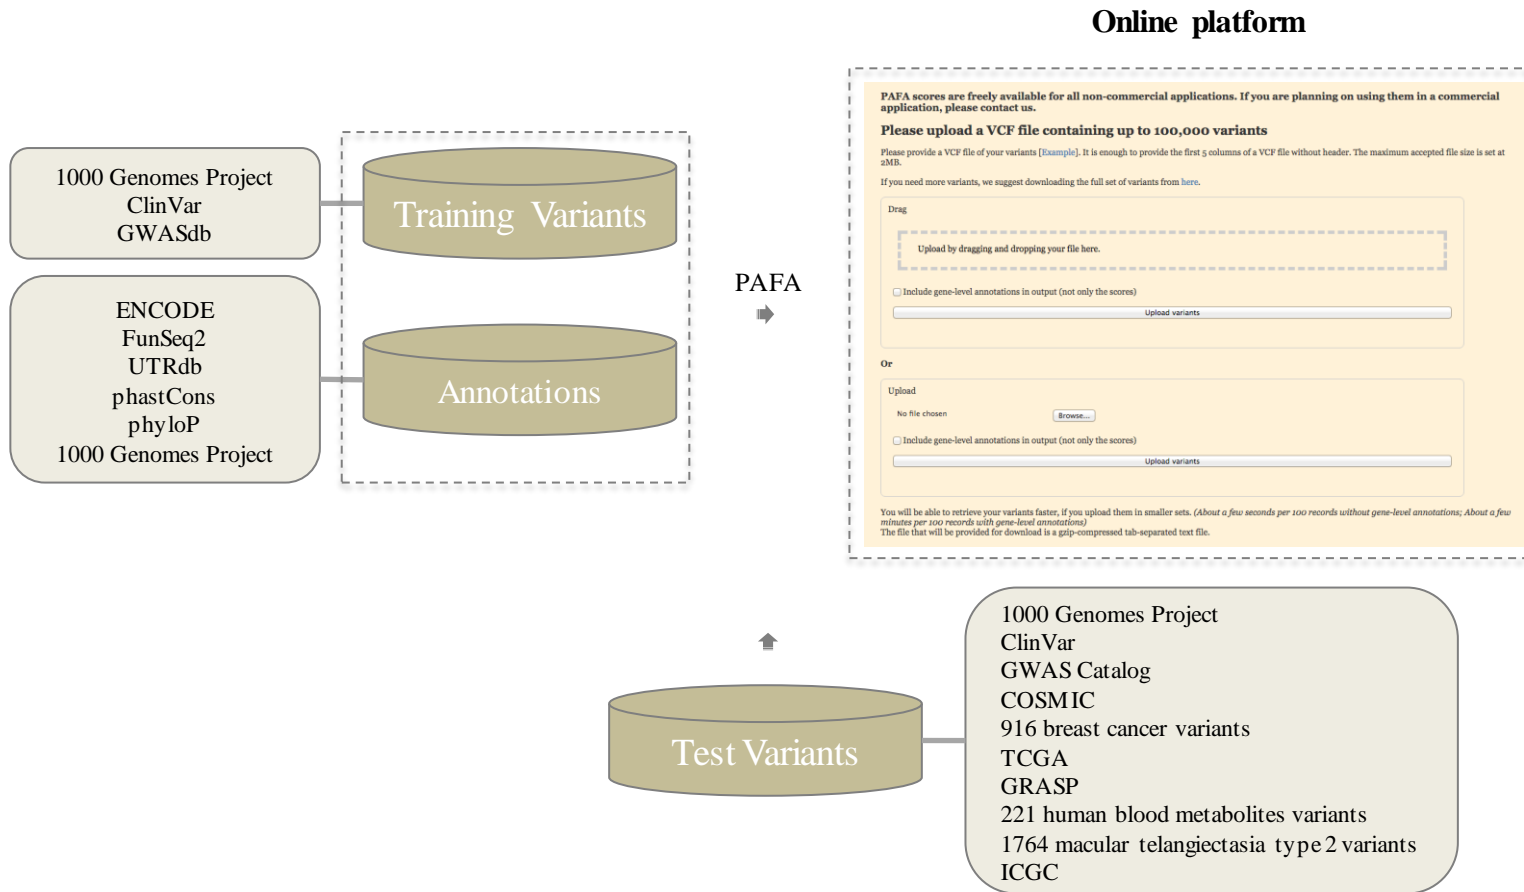

**Figure S1. Genetic and genomic resources used in PAFA and their screenshots.** PAFA contains variants used in the training stage and feature groups to annotate variants. Variants from multiple sources are used for testing the performance of PAFA.

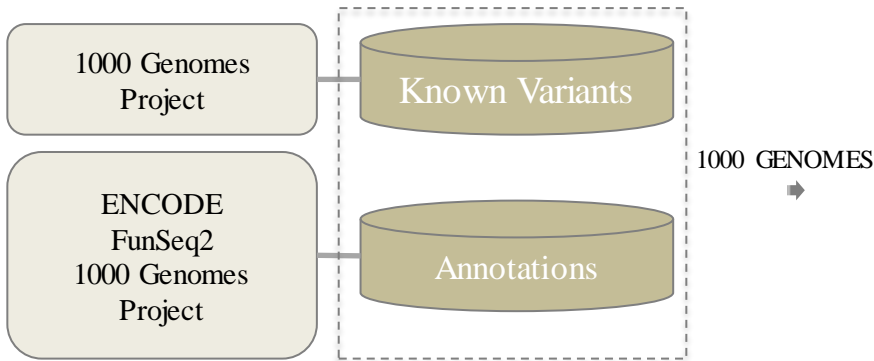

## Online platform

1000 GENOMES Project (Phase 3 variant calls)

Search relevant information by Variant ID/Position:  Submit  
 (eg. Variant ID: rs8184778 | Position: chr1:95974688-95974693)

Variants with similar allele frequency spectra:  
 Allele Frequency: AFR: 0.1 AMR: 0.5 EAS: 0.1 EUR: 0.5 SAS: 0.5  
 Similarity Offset: AFR: 0.1 AMR: 0.2 EAS: 0.1 EUR: 0.1 SAS: 0.2 (Co.) Submit

Result

Variants in 1000 Genomes

| No. | Chr  | Pos.Start | Pos.End   | Type | SubType | ID        | REP | ALT | AFR_af | AMR_af | EAS_af | EUR_af | SAS_af | Fit      | Rank    | %       |
|-----|------|-----------|-----------|------|---------|-----------|-----|-----|--------|--------|--------|--------|--------|----------|---------|---------|
| 1   | chr1 | 159174805 | 159174805 | SNP  | SNP     | r3027011  | A   | G   | 0.0991 | 0.0072 | 0      | 0      | 0      | 0.36582  | 682365  | Top 9%  |
| 2   | chr1 | 159174123 | 159174123 | SNP  | SNP     | r3027012  | C   | T   | 0.0066 | 0.2361 | 0.0238 | 0.3779 | 0.091  | 0.342923 | 523112  | Top 24% |
| 3   | chr1 | 159174259 | 159174259 | SNP  | SNP     | r3027013  | C   | T   | 0.0015 | 0.0693 | 0      | 0.0435 | 0.0123 | 0.228469 | 1942704 | Top 6%  |
| 4   | chr1 | 159174346 | 159174346 | SNP  | SNP     | r17382088 | CCT | C   | 0.0083 | 0.0072 | 0      | 0      | 0      | 0.303755 | 602946  | Top 9%  |
| 5   | chr1 | 159174663 | 159174663 | SNP  | SNP     | r2814778  | T   | C   | 0.9437 | 0.0778 | 0      | 0.0066 | 0      | 0.080778 | 1       | <<1%    |

Genomic browser view showing variant tracks for a region on chromosome 1. The top track shows a blue bar representing the variant. Below it are several orange tracks representing other variants. A red vertical line indicates the position of the selected variant.

| No. | Chr  | Pos.Start | Pos.End   | Type     | SubType  | ID   | REP       | ALT | AFR_af | AMR_af | EAS_af | EUR_af | SAS_af | Fit | Rank      | % |
|-----|------|-----------|-----------|----------|----------|------|-----------|-----|--------|--------|--------|--------|--------|-----|-----------|---|
| 2   | chr1 | 159174889 | 159174889 | enhancer | enhancer | chr1 | 159174889 |     |        |        |        |        |        |     | 159173322 |   |
| 3   | chr1 | 159174866 | 159174866 | enhancer | enhancer | chr1 | 159174866 |     |        |        |        |        |        |     | 159171797 |   |
| 4   | chr1 | 159173960 | 159173960 | enhancer | enhancer | chr1 | 159173960 |     |        |        |        |        |        |     | 159175069 |   |
| 5   | chr1 | 159174804 | 159174804 | enhancer | enhancer | chr1 | 159174804 |     |        |        |        |        |        |     | 159174877 |   |
| 6   | chr1 | 159173951 | 159173951 | enhancer | enhancer | chr1 | 159173951 |     |        |        |        |        |        |     | 159174864 |   |
| 7   | chr1 | 159174621 | 159174621 | enhancer | enhancer | chr1 | 159174621 |     |        |        |        |        |        |     | 159173288 |   |
| 8   | chr1 | 159174032 | 159174032 | enhancer | enhancer | chr1 | 159174032 |     |        |        |        |        |        |     | 159172588 |   |

Figure S2. Genetic and genomic resources used in the 1000 GENOMES part of the PAFA online platform and their screenshots.

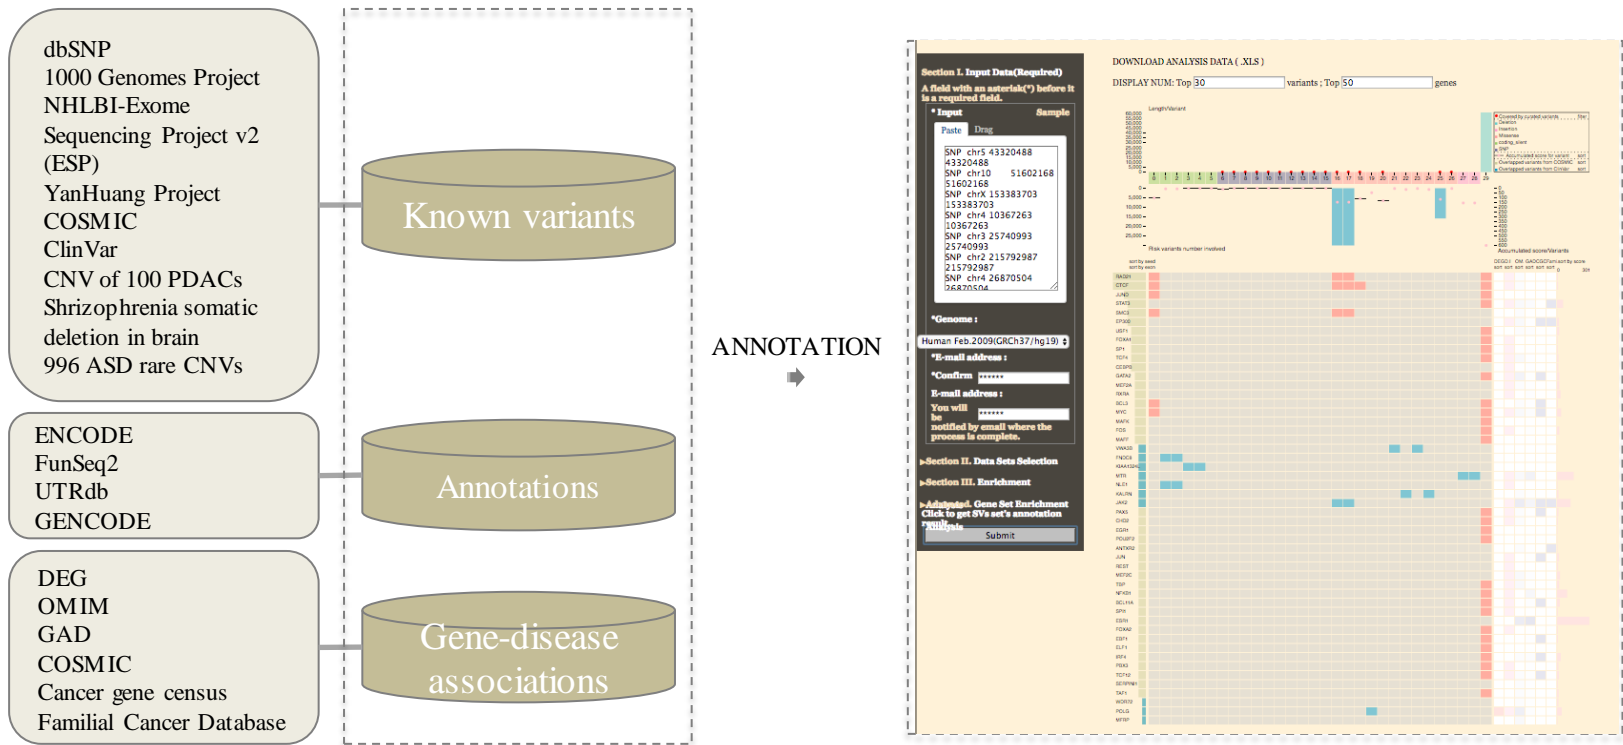

**Figure S3. Genetic and genomic resources used in the ANNOTATION part of the PAFA online platform and their screenshots.**

## Online platform

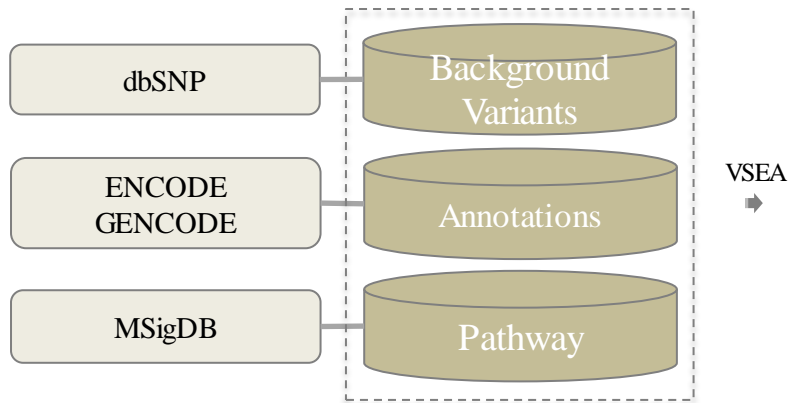

**Download Analyses Data (XLS)**

Section I. Variant & Overlapped Gene (GENCODE v19)

| chr | Type     | chromosome | start    | end      | chr_bp | breakpoint | Overlap |
|-----|----------|------------|----------|----------|--------|------------|---------|
| 1   | Deletion | chr22      | 80004272 | 80004277 | -      | -          | -       |
| 2   | Deletion | chr4       | 45733250 | 45733256 | -      | -          | -       |
| 3   | Deletion | chr4       | 80888027 | 80888437 | -      | -          | ANTXR4  |
| 4   | Deletion | chr8       | 30987704 | 30987703 | -      | -          | -       |

Section II. Gene & Pathway (MSigDB v4)

| chr | Gene | Overlapped | Related Pathways                                                                                                                                                                                                                                                                                                                                                                                                                                                                                                                                                                                                                                                                                                                                                                                                                                                                                                                                                                    |
|-----|------|------------|-------------------------------------------------------------------------------------------------------------------------------------------------------------------------------------------------------------------------------------------------------------------------------------------------------------------------------------------------------------------------------------------------------------------------------------------------------------------------------------------------------------------------------------------------------------------------------------------------------------------------------------------------------------------------------------------------------------------------------------------------------------------------------------------------------------------------------------------------------------------------------------------------------------------------------------------------------------------------------------|
| 1   | EP3  |            | CELL CYCLE, PATHWAYS IN CANCER, PANCREATIC CANCER, GLIOMA, PROSTATE CANCER, MELANOMA, BLADDER CANCER, CHRONIC MYELOID LEUKEMIA, SMALL CELL LUNG CANCER, NON SMALL CELL LUNG CANCER, G1 PATHWAY, CELL CYCLE PATHWAY, RPLP0 PATHWAY, IL6 PATHWAY, RAC1G2 PATHWAY, JAK3 PATHWAY, P21 PATHWAY, ARF PATHWAY, G1 AND S PHASES, RBG CASCADE OF CYCLIN EXP, E2F PATHWAY, NFAT1 PATHWAY, TETRAOXAEPATHWAY, IL4 PD1K2 PATHWAY, P21DOWNSTREAMPATHWAY, P21G2 PATHWAY, JES1 PATHWAY, JES1H2 PATHWAY, G1 AND EARLY G1, CELL CYCLE, ASSOCIATION OF LICENSING FACTORS WITH THE PRE REPLICATIVE COMPLEX, PRE NOTCH TRANSCRIPTION AND TRANSLATION, PRE NOTCH EXPRESSION AND PROCESSING, CELL CYCLE MITOTIC G1 PHASE, JNK ASSOCIATION WITH THE G2C ORIGIN COMPLEX, M G1-TRANSITION, G1 S PHASES, MITOTIC M G1 PHASE, MITOTIC G1 G1 M PHASE, ASSEMBLY OF THE PRE REPLICATIVE COMPLEX, SIGNALING BY NOTCH, INHIBITION OF REPLICATION INITIATION OF DAMAGED DNA BY RB, E2F, DNA REPLICATION, E2F MEDIATED |

Section III. Relationship among variants, Genes and Pathways

Link Distance: 100 | Change: 100 | Canvas Width: 1000 | Canvas Height: 350 | [Zoom In](#)

Section IV. Pathway p-Value (Fisher's exact test)

| chr | pathway                                      | test_variant_in_path | test_variant_out_in_path | log2_variant_in_path | log2_variant_out_in_path | p-value  | q-value  |
|-----|----------------------------------------------|----------------------|--------------------------|----------------------|--------------------------|----------|----------|
| 1   | REGULATION OF THE FANCONI ANEMIA PATHWAY     | 1                    | 00                       | 0                    | 0238                     | 0.038e-3 | 0.000e-3 |
| 1   | R3 PATHWAY                                   | 1                    | 00                       | 1                    | 0237                     | 0.038e-3 | 0.007e-3 |
| 1   | TRAFFICKING AND PROCESSING OF ENDOCHONAL TLR | 1                    | 00                       | 0                    | 0236                     | 3.083e-3 | 3.764e-3 |
| 1   | G1 M CHECKPOINTS                             | 1                    | 00                       | 0                    | 0236                     | 3.083e-3 | 3.103e-3 |

Section V. Networks: Pathway & Related Genes

There are two main nodes and links, click to open in new window please.

Figure S4. Genetic and genomic resources used in the VSEA part of the PAFA online platform and their screenshots.

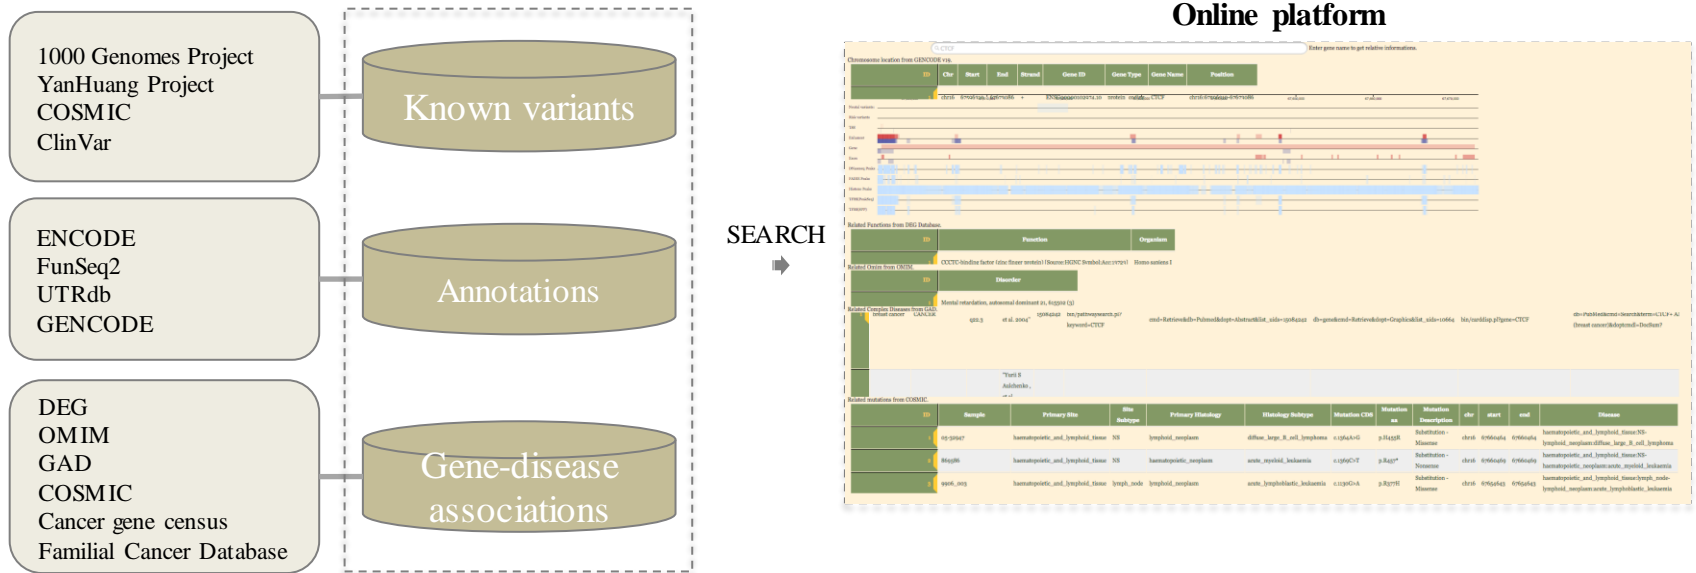

**Figure S5. Genetic and genomic resources used in the SEARCH part of the PAFA online platform and their screenshots.**





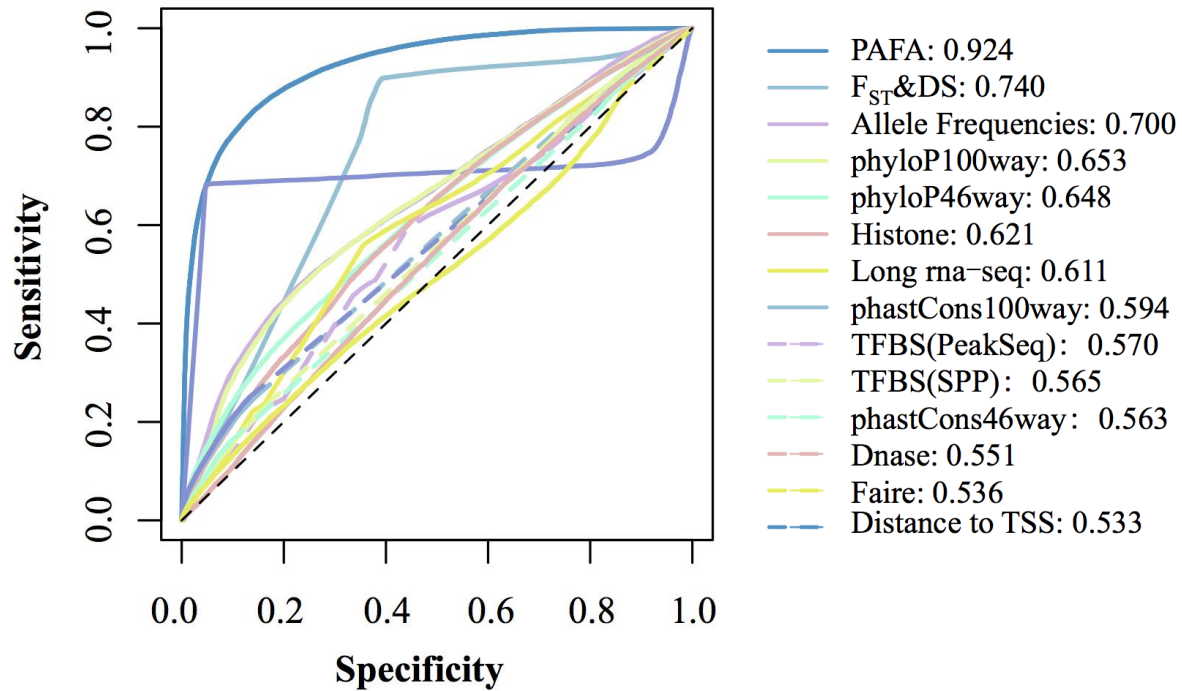

**Figure S8. Ten-fold cross-validations are applied to evaluate the performance of features used in PAFA.**

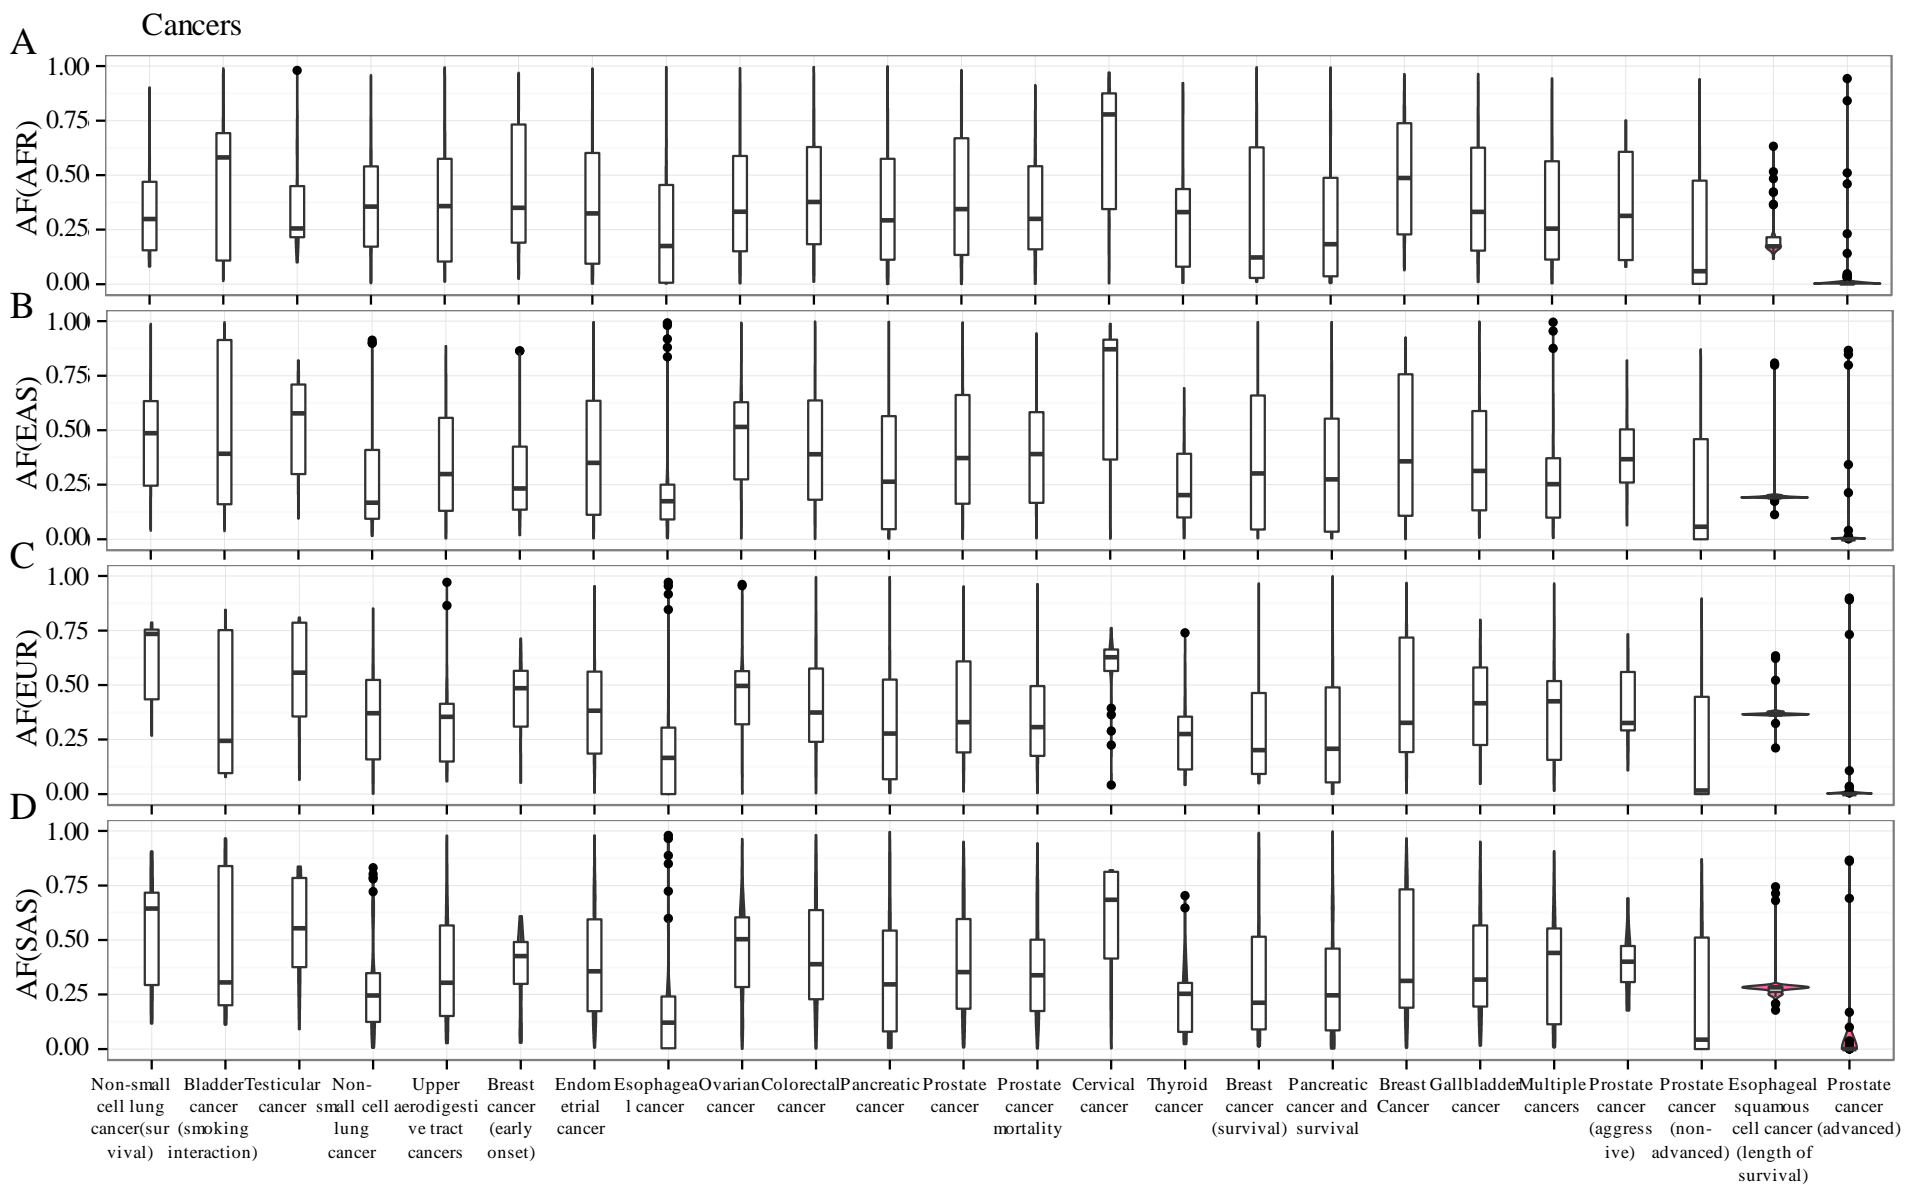

**Figure S9. Distribution of allele frequencies for twenty-four cancer-associated variant sets from GWASdb among super populations.** (A) Allele frequencies among African (AFR). (B) Allele frequencies among East Asian (EAS). (C) Allele frequencies among European (EUR). (D) Allele frequencies among South Asian (SAS).

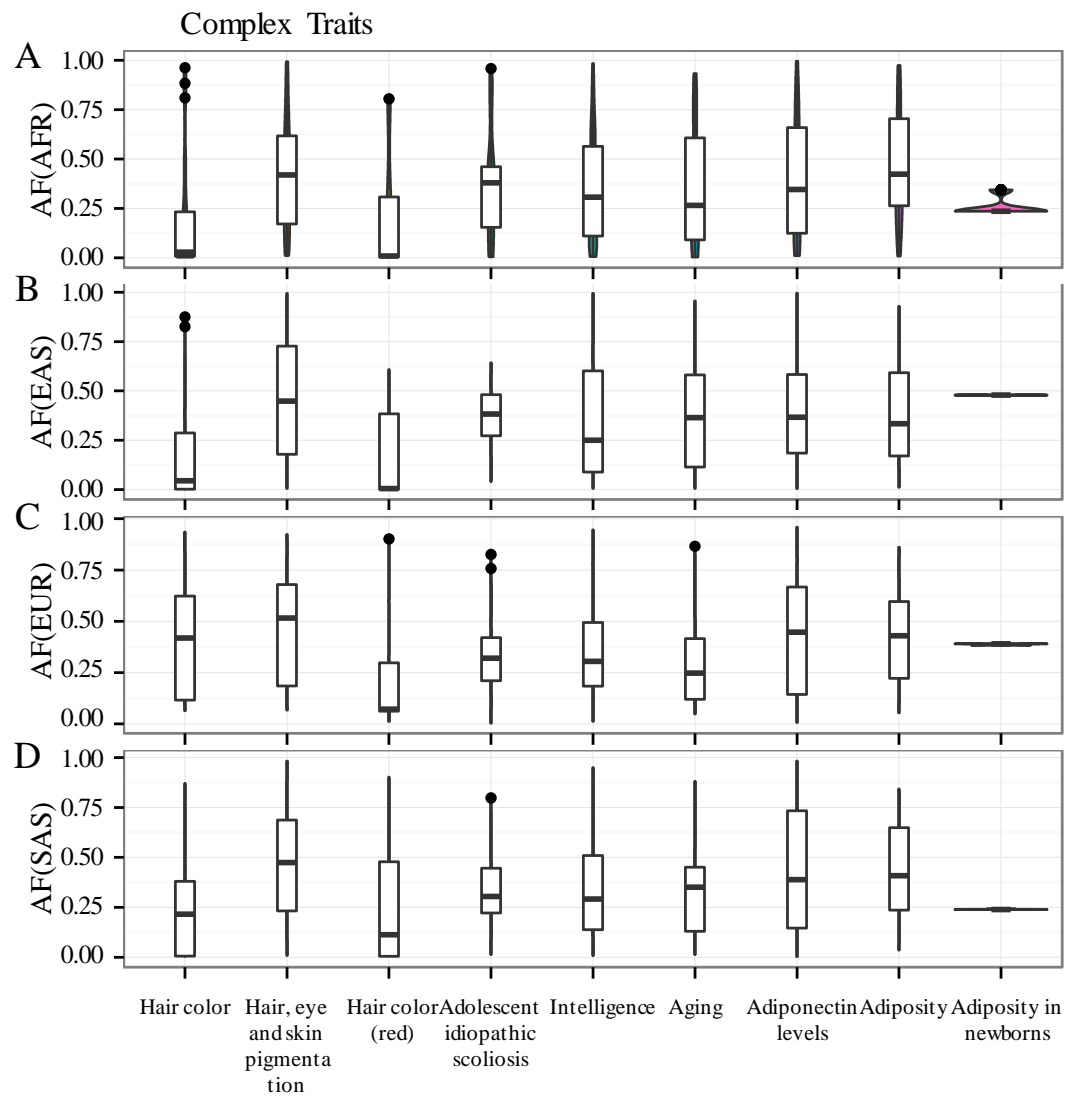

**Figure S10. Distribution of allele frequencies for nine complex trait-associated variant sets from GWASdb among super populations. (A)** Allele frequencies among African (AFR). **(B)** Allele frequencies among East Asian (EAS). **(C)** Allele frequencies among European (EUR). **(D)** Allele frequencies among South Asian (SAS).

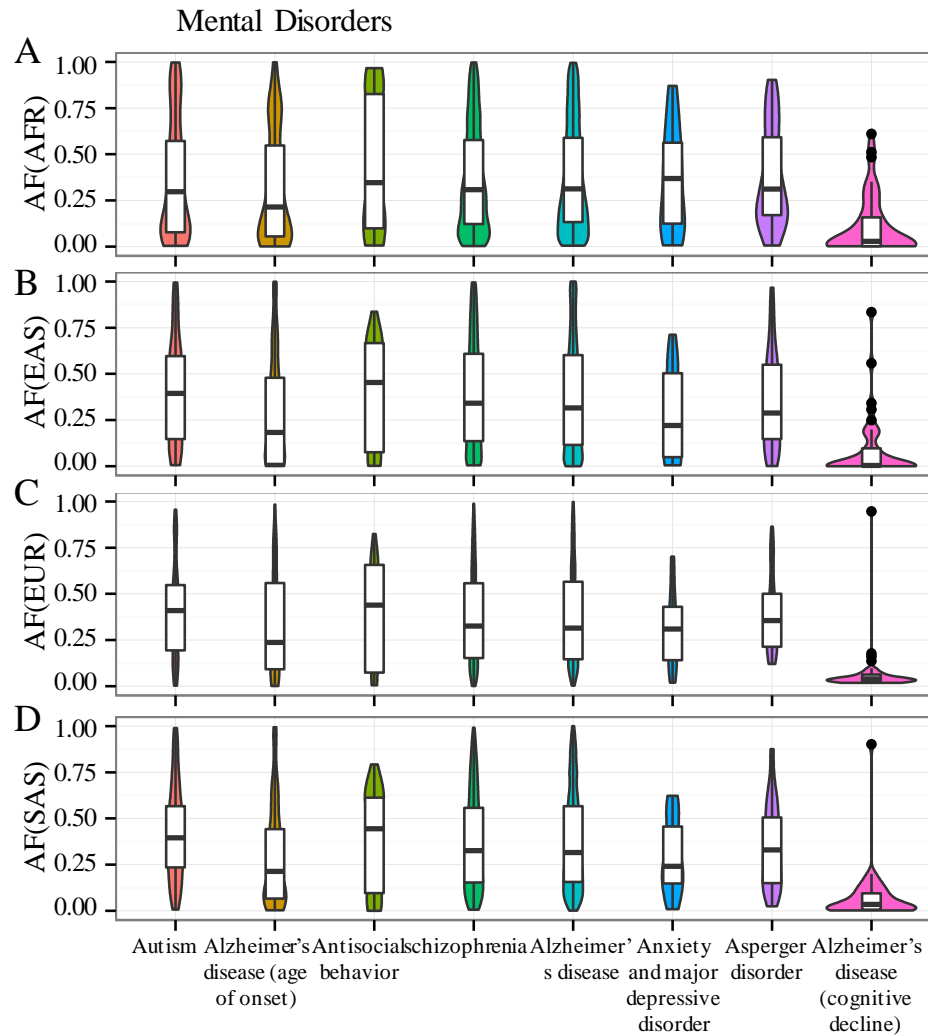

**Figure S11. Distribution of allele frequencies for eight mental disorder-associated variant sets. (A)** Allele frequencies among African (AFR). **(B)** Allele frequencies among East Asian (EAS). **(C)** Allele frequencies among European (EUR). **(D)** Allele frequencies among South Asian (SAS).

Other Complex diseases

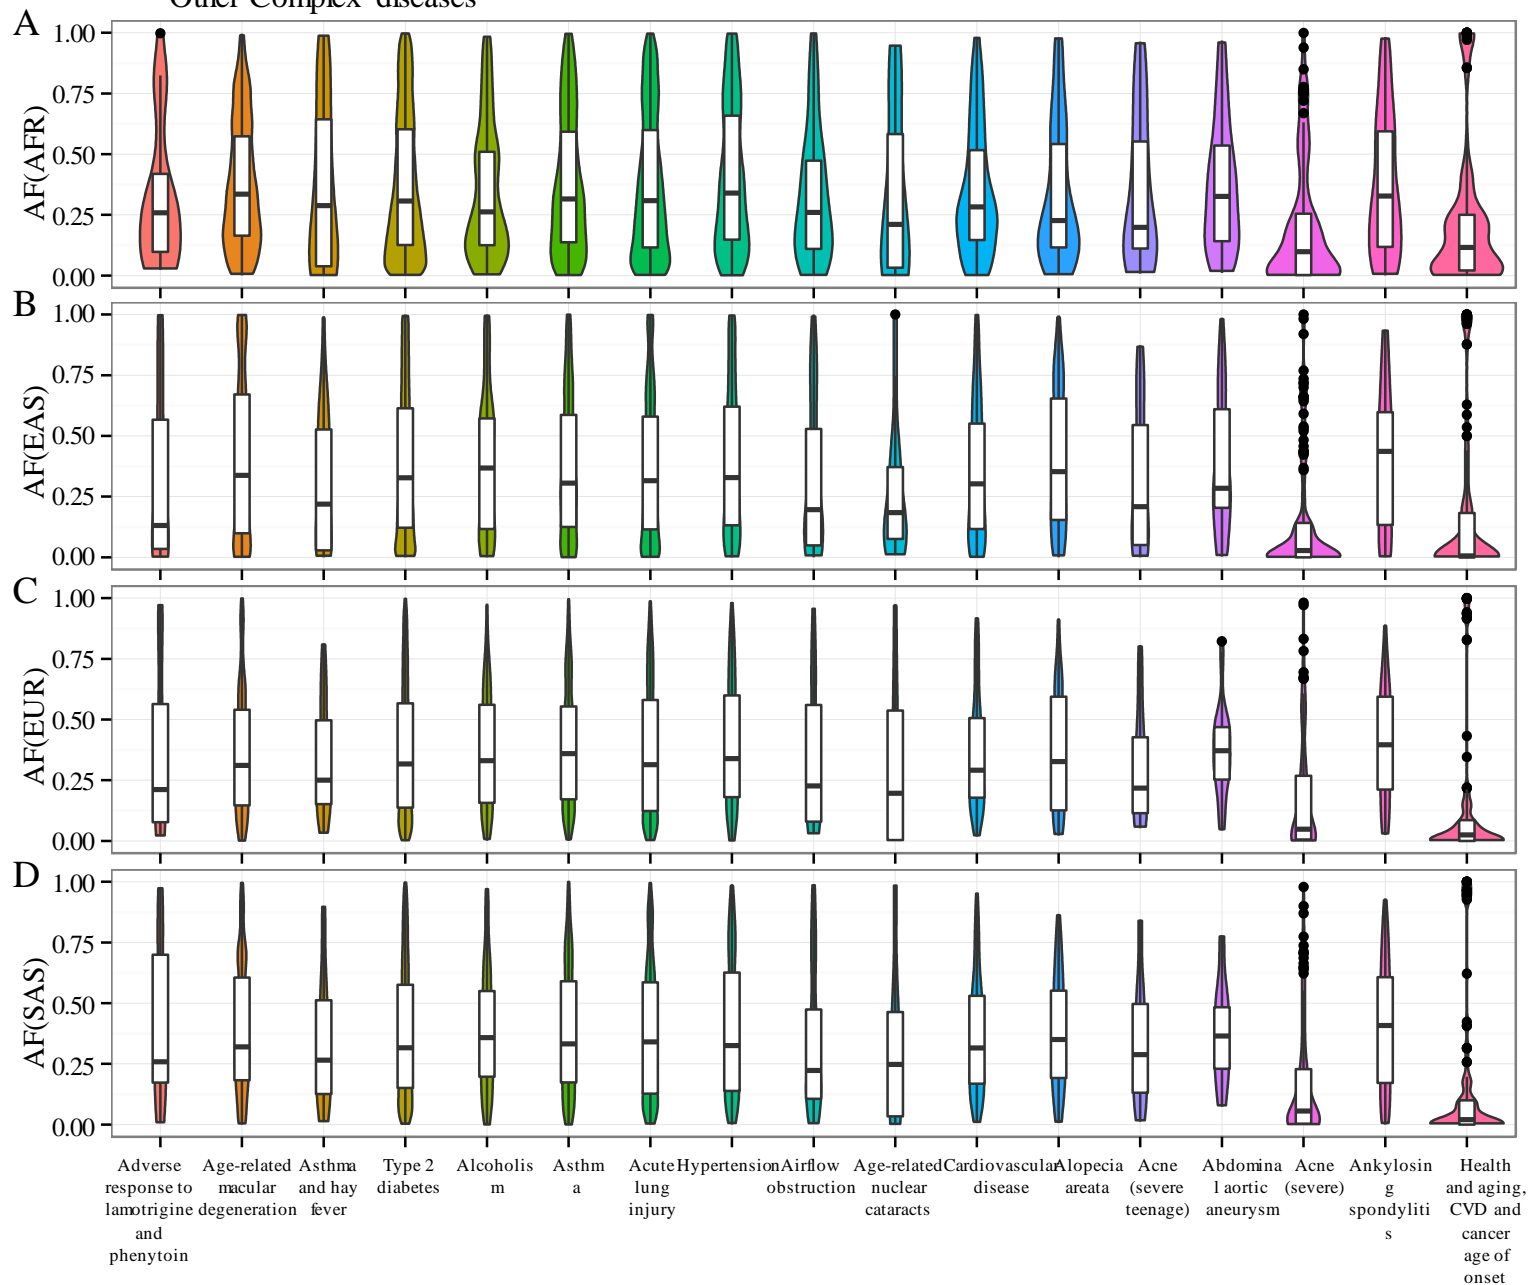

**Figure S12. Distribution of allele frequencies for seventeen complex disease-associated variant sets. (A)** Allele frequencies among African (AFR). **(B)** Allele frequencies among East Asian (EAS). **(C)** Allele frequencies among European (EUR). **(D)** Allele frequencies among South Asian (SAS).

A

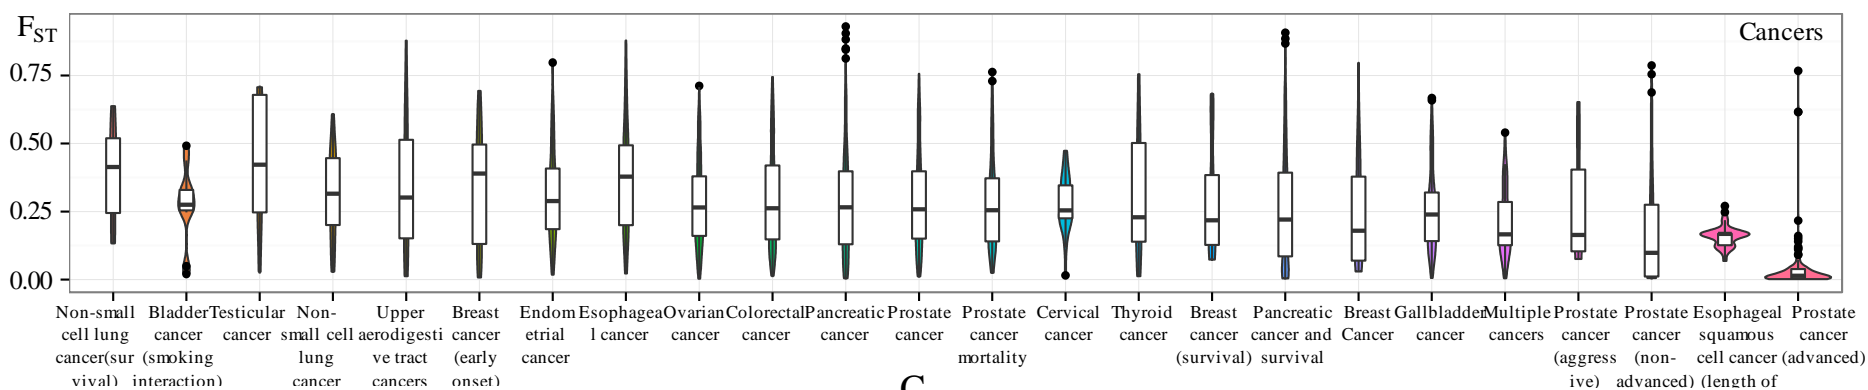

B

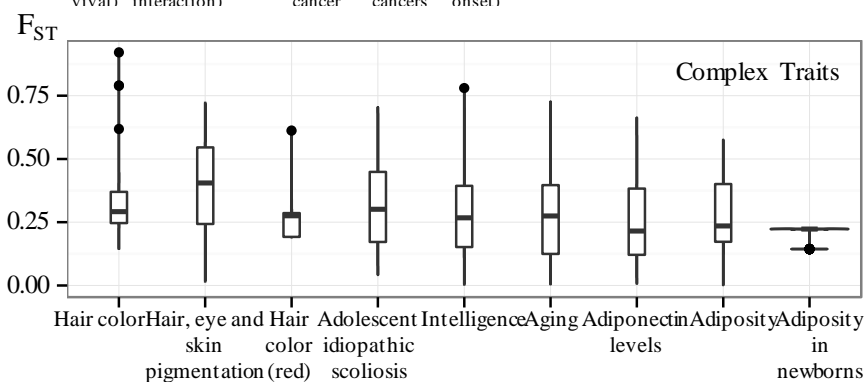

C

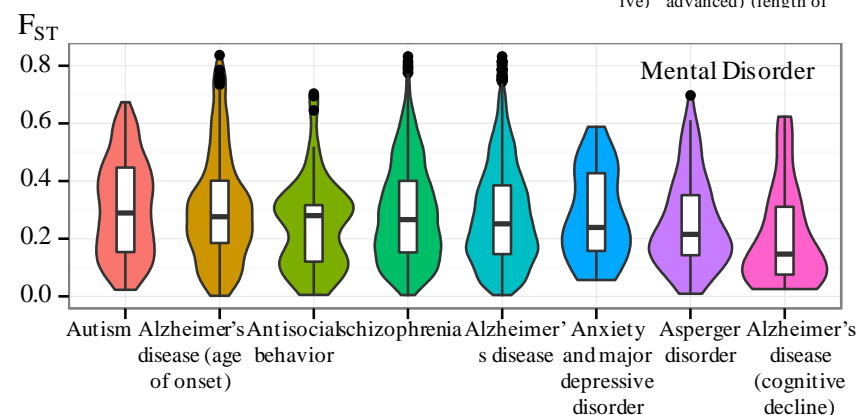

D

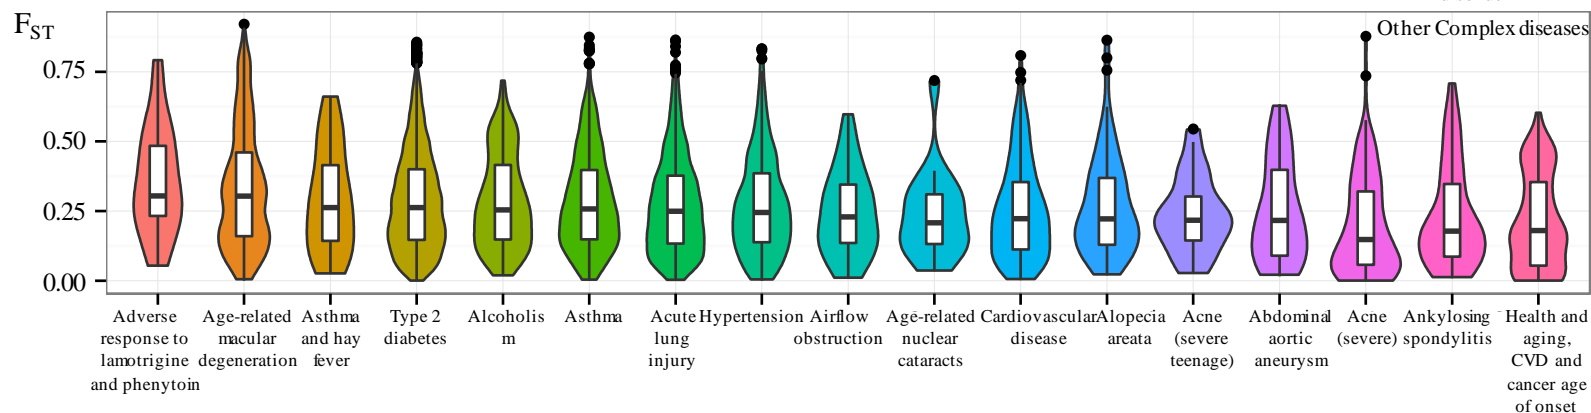

**Figure S13. Distribution of  $F_{ST}$  values for variant sets associated with complex diseases and traits. (A) Cancer-associated variant sets. (B) Complex trait-associated variant sets. (C) Mental disorder-associated variant set. (D) Other complex disease-associated variant sets.**

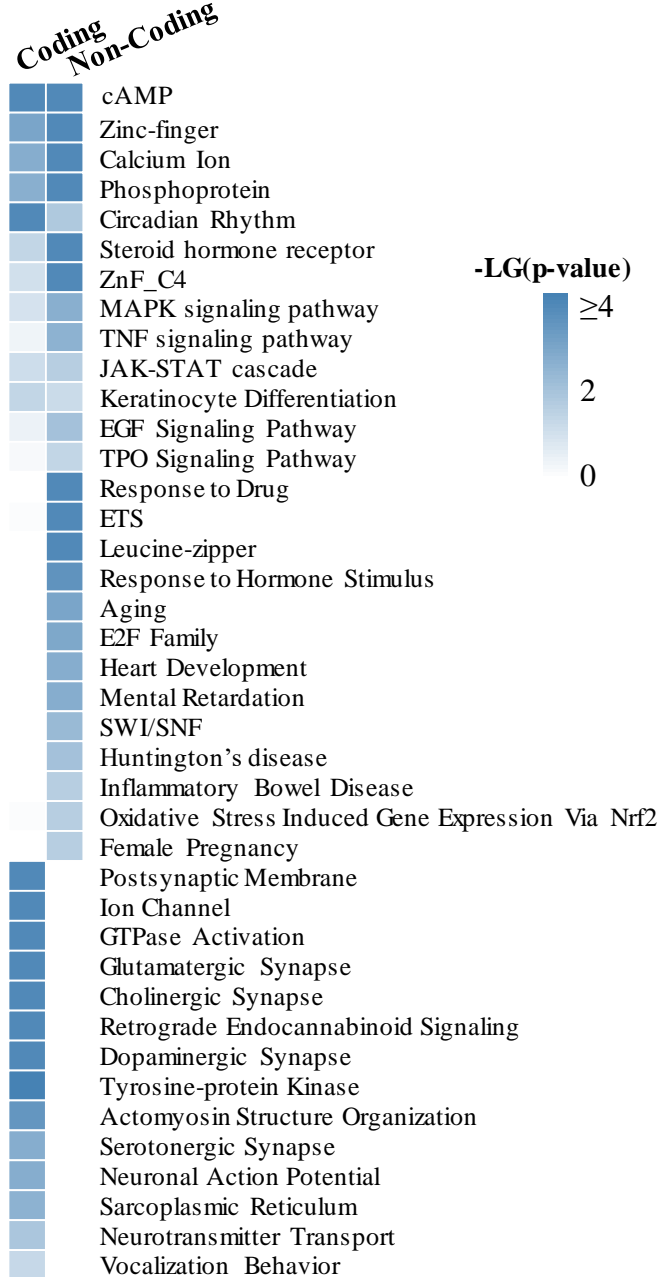

**Figure S14. Enriched pathways of genes associated with coding and non-coding variants.** DAVID was applied to analyze the enrichment of gene sets.

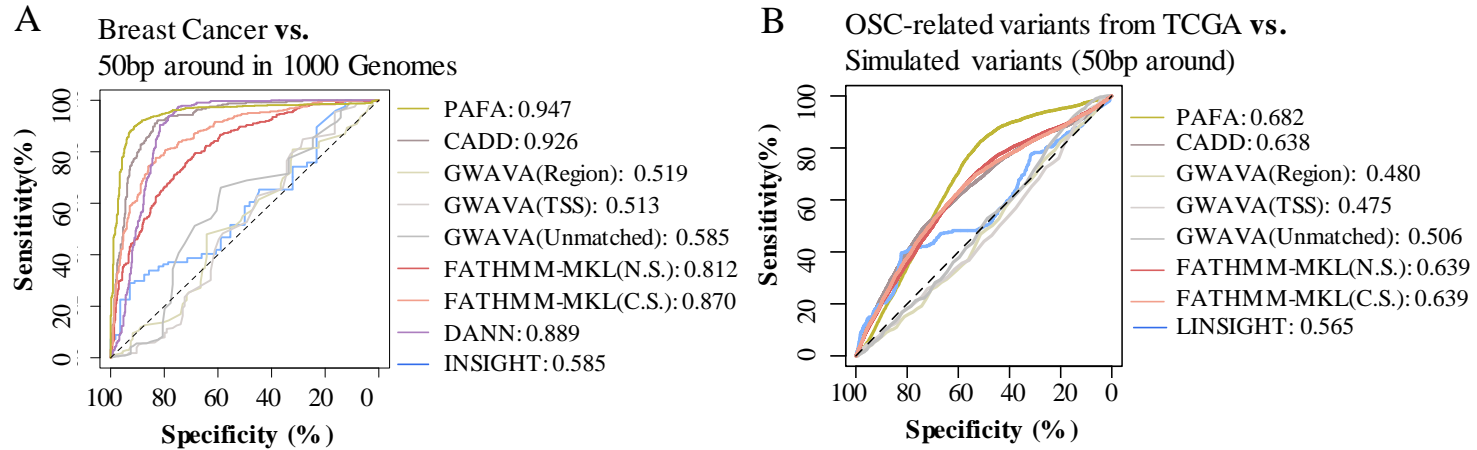

**Figure S15. Sensitivity and specificity of tools in distinguishing coding risk variants from adjacent variants.**

Receiver operating characteristics (ROC) curves are exhibited. The dashed line indicates random chance. The value of the area under the curve (AUC) is calculated for each score. **(A)** Prioritization of 916 possible driver variants associated with breast cancer from 474 adjacent variants (50 bp upstream and downstream) from 1000 Genomes. **(B)** Prioritization of 6133 variants associated with ovarian serous cystadenocarcinoma (OSC) from 6133 simulated noncoding rare variants (50 bp upstream and downstream). Such analyses were repeated 10 times and the average AUC values were shown.

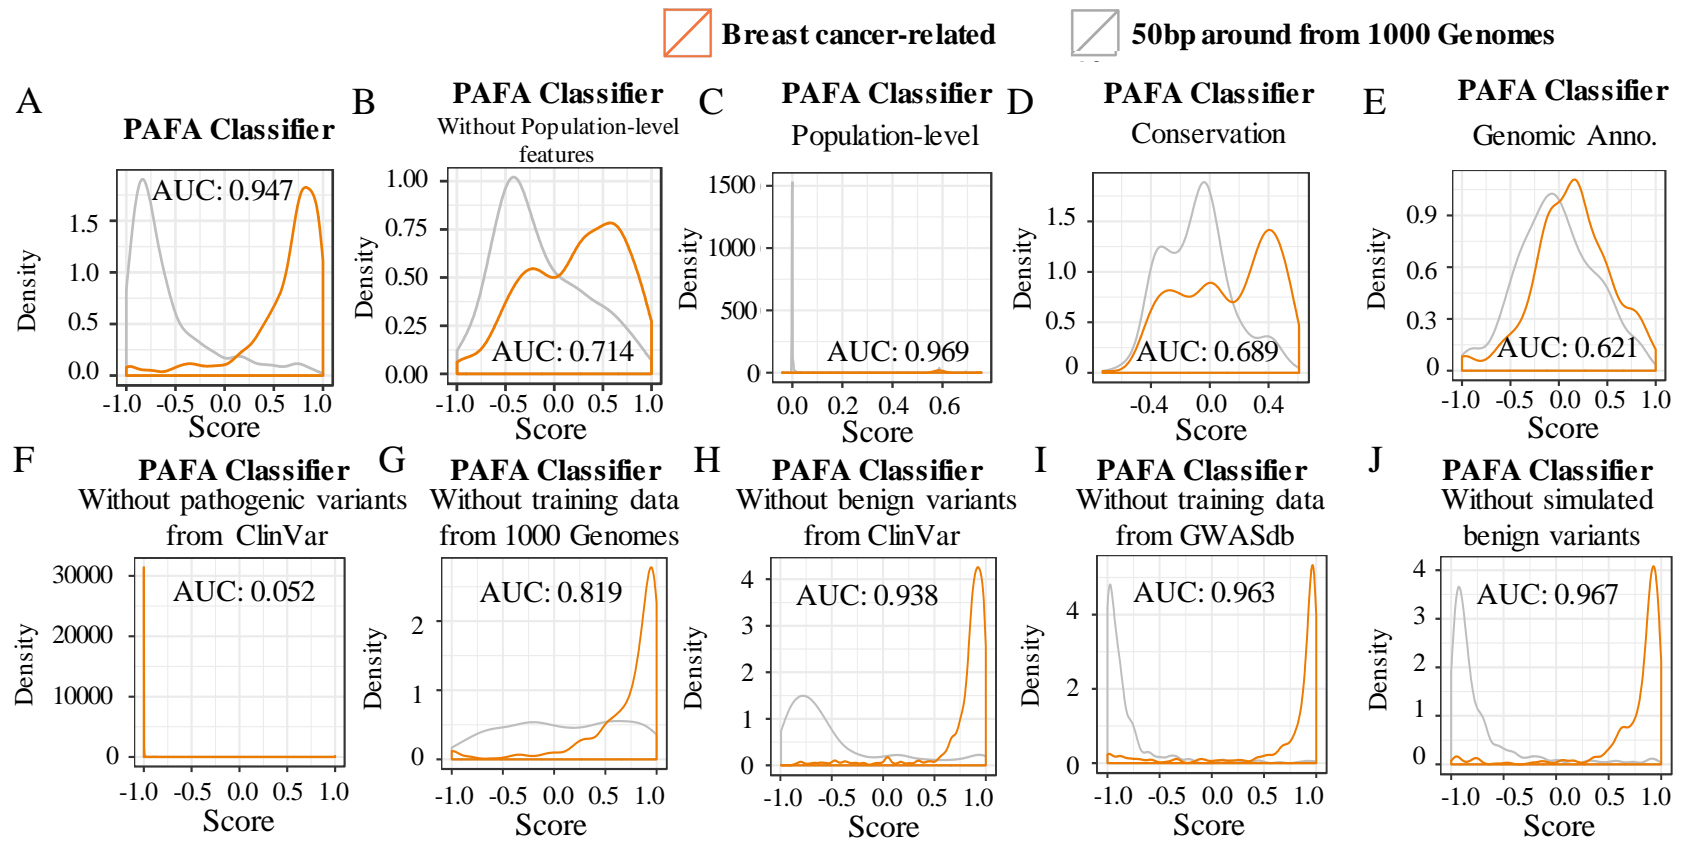

**Figure S16. Distributions of PAFA scores for breast cancer-related variants and adjacent variants from the 1000 Genomes.** (A) The PAFA classifier. (B) The PAFA classifier constructed based on evolutionary conservation and genomic annotation features. (C) The PAFA classifier constructed based on population differentiation features. (D) The PAFA classifier constructed based on evolutionary conservation features. (E) The PAFA classifier constructed based on genomic annotation features. (F) The PAFA classifier constructed without pathogenic variants from ClinVar. (G) The PAFA classifier constructed without training data from 1000 Genomes. (H) The PAFA classifier constructed without benign variants from ClinVar. (I) The PAFA classifier constructed without training data from GWASdb. (J) The PAFA classifier constructed without simulated benign variants.

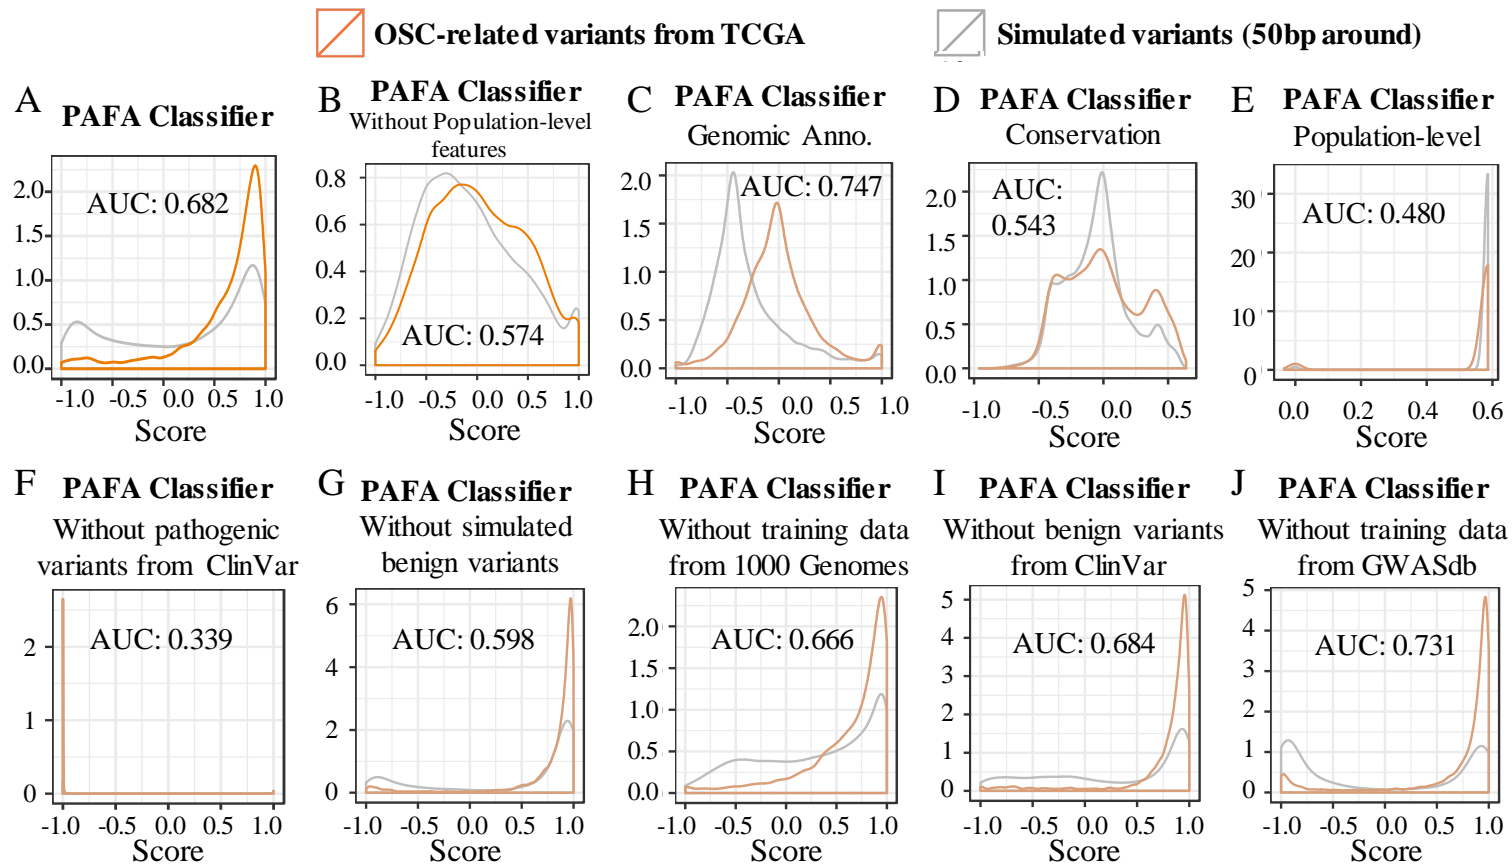

**Figure S17. Distributions of PAFA scores for OSC-related variants from TCGA and simulated noncoding rare variants.** (A) The PAFA classifier. (B) The PAFA classifier constructed based on evolutionary conservation and genomic annotation features. (C) The PAFA classifier constructed based on genomic annotation features. (D) The PAFA classifier constructed based on evolutionary conservation features. (E) The PAFA classifier constructed based on population differentiation features. (F) The PAFA classifier constructed without pathogenic variants from ClinVar. (G) The PAFA classifier constructed without simulated benign variants. (H) The PAFA classifier constructed without training data from 1000 Genomes. (I) The PAFA classifier constructed without benign variants from ClinVar. (J) The PAFA classifier constructed without training data from GWASdb.

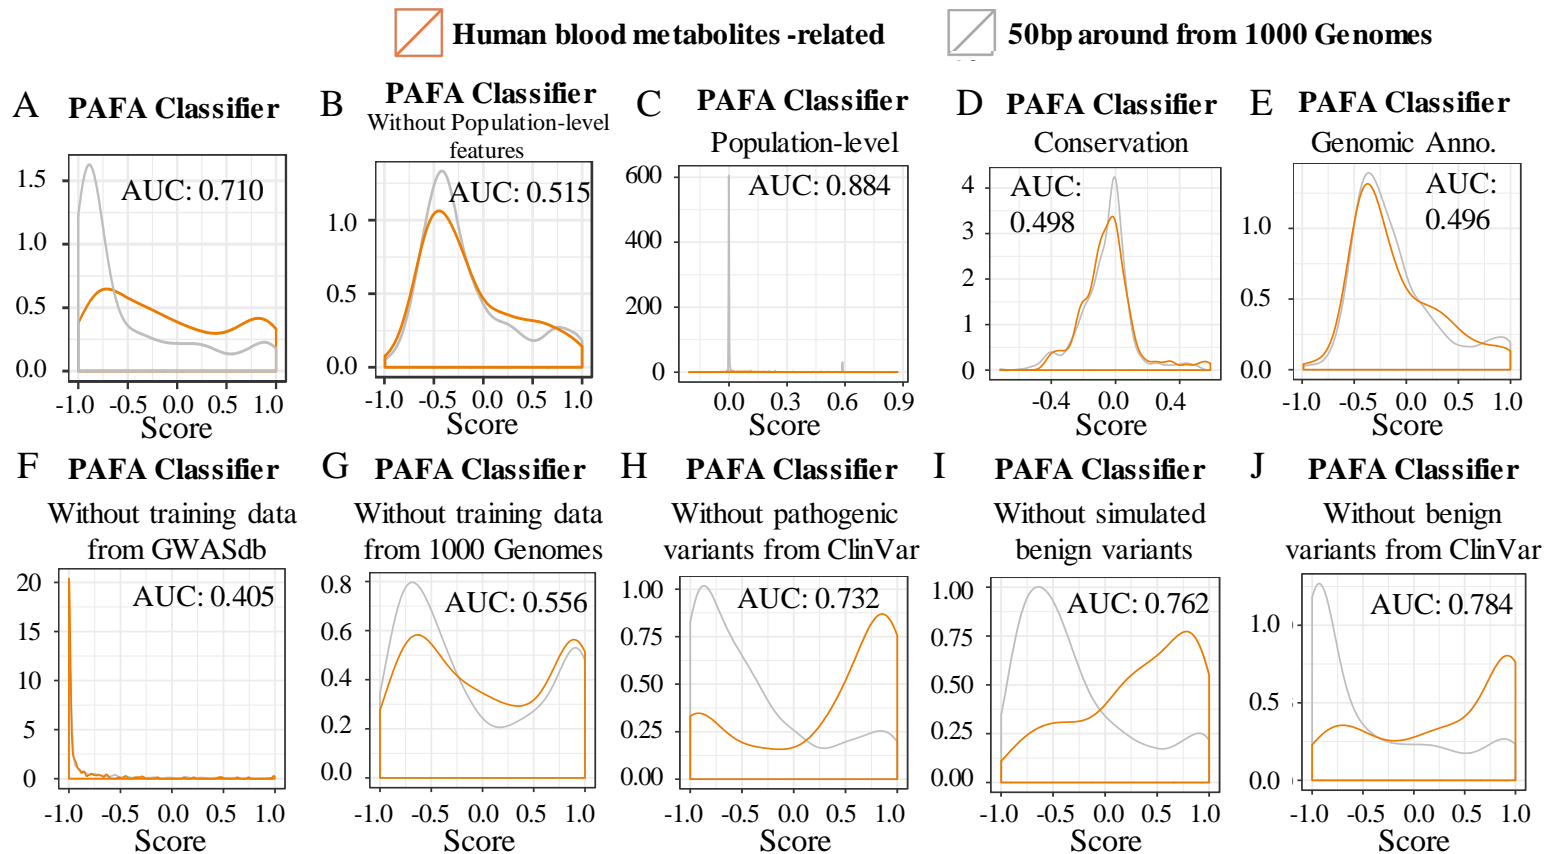

**Figure S18. Distributions of PAFA scores for human blood metabolites-related variants and adjacent variants from 1000 Genomes.** (A) The PAFA classifier. (B) The PAFA classifier constructed based on evolutionary conservation and genomic annotation features. (C) The PAFA classifier constructed based on population differentiation features. (D) The PAFA classifier constructed based on evolutionary conservation features. (E) The PAFA classifier constructed based on genomic annotation features. (F) The PAFA classifier constructed without training data from GWASdb. (G) The PAFA classifier constructed without training data from 1000 Genomes. (H) The PAFA classifier constructed without pathogenic variants from ClinVar. (I) The PAFA classifier constructed without simulated benign variants. (J) The PAFA classifier constructed without benign variants from ClinVar.

Macular telangiectasia type 2-related
  50bp around from 1000 Genomes

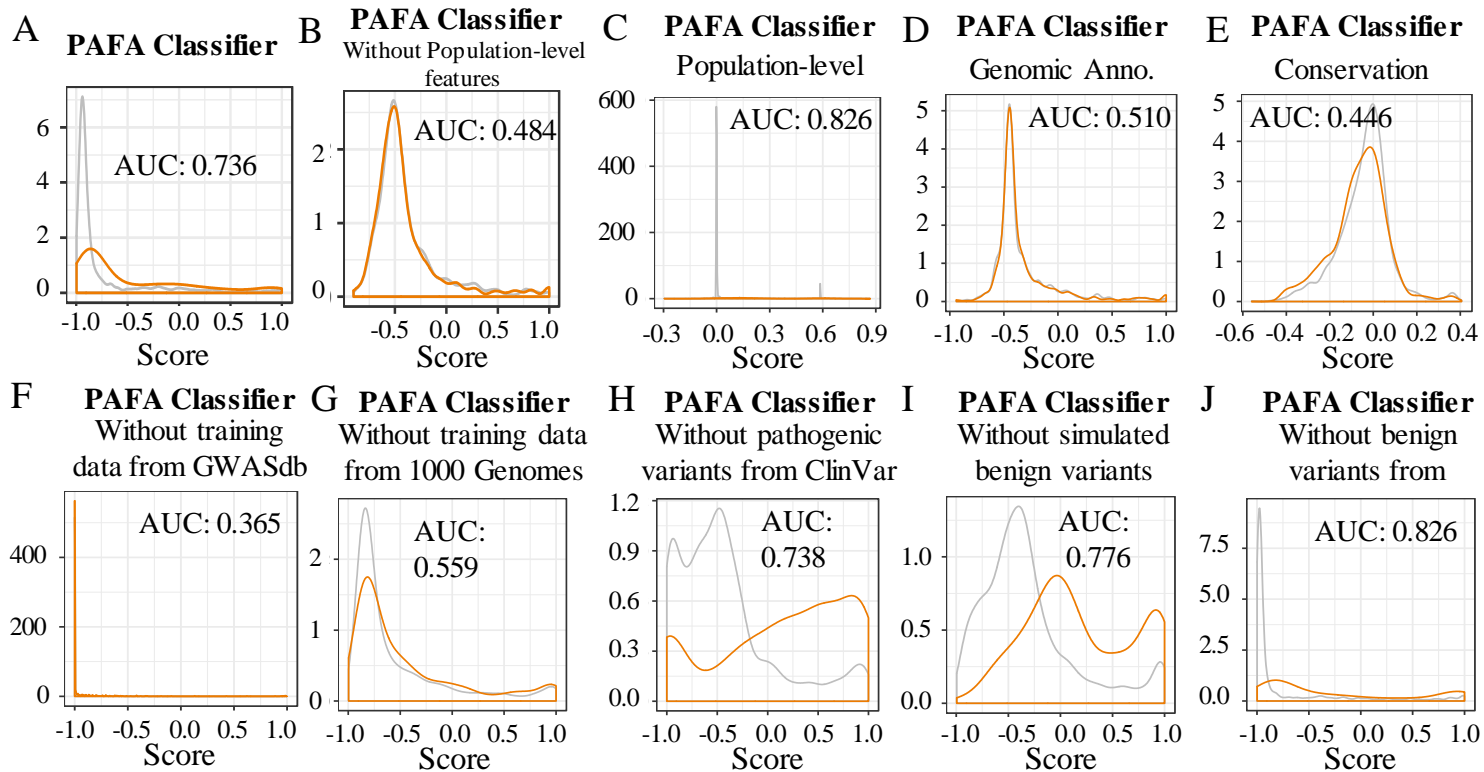

**Figure S19. Distributions of PAFA scores for macular telangiectasia type 2-related variants and adjacent variants from 1000 Genomes.** (A) The PAFA classifier. (B) The PAFA classifier constructed based on evolutionary conservation and genomic annotation features. (C) The PAFA classifier constructed based on population differentiation features. (D) The PAFA classifier constructed based on genomic annotation features. (E) The PAFA classifier constructed based on evolutionary conservation features. (F) The PAFA classifier constructed without training data from GWASdb. (G) The PAFA classifier constructed without training data from 1000 Genomes. (H) The PAFA classifier constructed without pathogenic variants from ClinVar. (I) The PAFA classifier constructed without simulated benign variants. (J) The PAFA classifier constructed without benign variants from ClinVar.

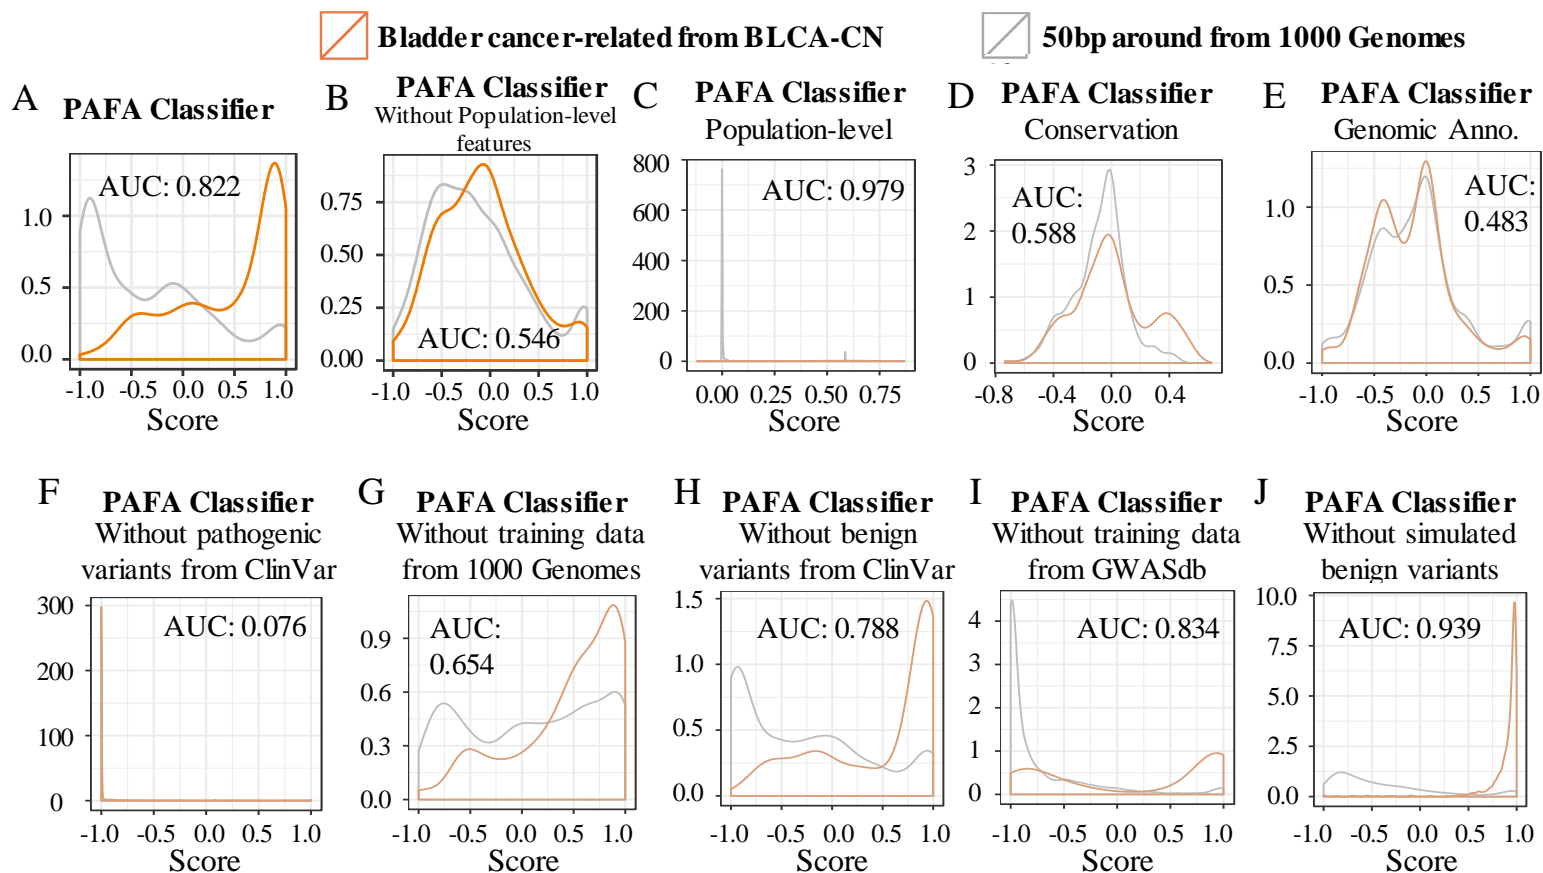

**Figure S20. Distributions of PAFAscores for bladder cancer-related variants and adjacent variants from 1000 Genomes.** (A) The PAFA classifier. (B) The PAFA classifier constructed based on evolutionary conservation and genomic annotation features. (C) The PAFA classifier constructed based on population differentiation features. (D) The PAFA classifier constructed based on evolutionary conservation features. (E) The PAFA classifier constructed based on genomic annotation features. (F) The PAFA classifier constructed without pathogenic variants from ClinVar. (G) The PAFA classifier constructed without training data from 1000 Genomes. (H) The PAFA classifier constructed without benign variants from ClinVar. (I) The PAFA classifier constructed without training data from GWASdb. (J) The PAFA classifier constructed without simulated benign variants
